# Supplementary material for: Evaluation of Adjuvant Treatments for T1 N0 M0 Triple-Negative Breast Cancer
Source: PubMed Central journal article supplement (PMC7677762; doi:10.1001/jamanetworkopen.2020.21881), 2020-11-19

## Supplemental Online Content

Zhai Z, Zheng Y, Yao J, et al. Evaluation of adjuvant treatments for T1 N0 M0 triple-negative breast cancer. *JAMA Netw Open*. 2020;3(11):e2021881.  
doi:10.1001/jamanetworkopen.2020.21881

**eTable.** Univariate and Multivariate COX Analysis of Overall Survival in Patients With T1N0M0 TNBC

**eFigure.** Flowchart for Included Patients From the SEER

This supplemental material has been provided by the authors to give readers additional information about their work.

**eTable.** Univariate and multivariate COX analysis of overall survival in patients with T1N0M0 TNBC.

| Characteristic           | Patients.n | Events.n | Rates,% | Univariate Analysis  |         | Multivariable Analysis |         |
|--------------------------|------------|----------|---------|----------------------|---------|------------------------|---------|
|                          |            |          |         | OS HR (95% CI)       | P Value | OS AHR (95% CI)        | P Value |
| Age                      |            |          |         |                      |         |                        |         |
| 50-70                    | 4328       | 194      | 4.48    | Reference            |         | Reference              |         |
| <35                      | 173        | 10       | 5.78    | 1.297 (0.687-2.448)  | 0.42    | 1.199 (0.627-2.290)    | 0.58    |
| 35-50                    | 1523       | 62       | 4.07    | 0.901 (0.677-1.200)  | 0.48    | 0.856 (0.639-1.147)    | 0.30    |
| ≥70                      | 1715       | 195      | 11.37   | 2.631 (2.157-3.210)  | <0.001  | 2.090 (1.677-2.604)    | <0.001  |
| Race                     |            |          |         |                      |         |                        |         |
| Non-Hispanic White       | 4997       | 301      | 6.02    | Reference            |         | Reference              |         |
| Non-Hispanic Black       | 1377       | 94       | 6.83    | 1.171 (0.929-1.476)  | 0.18    | 1.169 (0.923-1.483)    | 0.20    |
| Non-Hispanic Other Races | 569        | 28       | 4.92    | 0.864 (0.586-1.272)  | 0.46    | 0.910 (0.617-1.342)    | 0.63    |
| Hispanic (All Races)     | 796        | 38       | 4.77    | 0.877 (0.626-1.229)  | 0.45    | 0.924 (0.657-1.300)    | 0.65    |
| Marital Status           |            |          |         |                      |         |                        |         |
| Married                  | 4790       | 228      | 4.76    | Reference            |         | Reference              |         |
| Single                   | 1064       | 63       | 5.92    | 1.241 (0.939-1.641)  | 0.13    | 1.204 (0.906-1.600)    | 0.20    |
| DSW                      | 1885       | 170      | 9.02    | 1.870 (1.533-2.281)  | <0.001  | 1.385 (1.122-1.708)    | 0.002   |
| Grade                    |            |          |         |                      |         |                        |         |
| G1                       | 276        | 8        | 2.90    | Reference            |         | Reference              |         |
| G2                       | 1775       | 105      | 5.92    | 2.162 (1.053-4.436)  | 0.04    | 2.254 (1.096-4.637)    | 0.03    |
| G3                       | 5644       | 340      | 6.02    | 2.242 (1.112-4.519)  | 0.02    | 2.653 (1.308-5.379)    | 0.007   |
| G4                       | 44         | 8        | 18.18   | 6.116 (2.295-16.297) | <0.001  | 6.484 (2.417-17.396)   | <0.001  |
| Stage                    |            |          |         |                      |         |                        |         |
| T1a                      | 755        | 23       | 3.05    | Reference            |         | Reference              |         |
| T1b                      | 1979       | 85       | 4.30    | 1.329 (0.838-2.106)  | 0.23    | 1.549 (0.973-2.466)    | 0.06    |
| T1c                      | 5005       | 353      | 7.05    | 2.287 (1.500-3.488)  | <0.001  | 2.829 (1.834-4.363)    | <0.001  |
| Surgery                  |            |          |         |                      |         |                        |         |
| BCS                      | 5372       | 282      | 5.25    | Reference            |         | Reference              |         |
| Simple                   | 1798       | 133      | 7.40    | 1.456 (1.184-1.789)  | <0.001  | 1.325 (1.009-1.739)    | 0.04    |
| Radical                  | 463        | 41       | 8.86    | 1.484 (1.069-2.059)  | 0.02    | 1.206 (0.833-1.744)    | 0.32    |
| Other                    | 106        | 5        | 4.72    | 1.328 (0.548-3.218)  | 0.53    | 1.855 (0.749-4.593)    | 0.18    |
| Adjuvant Therapy         |            |          |         |                      |         |                        |         |
| No                       | 1286       | 146      | 11.35   | Reference            |         | Reference              |         |
| Chemotherapy             | 2202       | 101      | 4.59    | 0.427 (0.332-0.551)  | <0.001  | 0.475 (0.362-0.625)    | <0.001  |
| Radiotherapy             | 1278       | 88       | 6.89    | 0.580 (0.445-0.756)  | <0.001  | 0.726 (0.528-0.997)    | 0.04    |
| Both                     | 2973       | 126      | 4.24    | 0.368 (0.290-0.467)  | <0.001  | 0.489 (0.362-0.661)    | <0.001  |

**Abbreviations:** TNBC: triple-negative breast cancer; OS: overall survival; HR: hazard ratio; AHR: adjusted hazard ratio; CI: confidence interval; DSW: divorced/separated/widowed; BCS: breast-conserving surgery.

**eFigure.** Flowchart for included patients from the SEER.

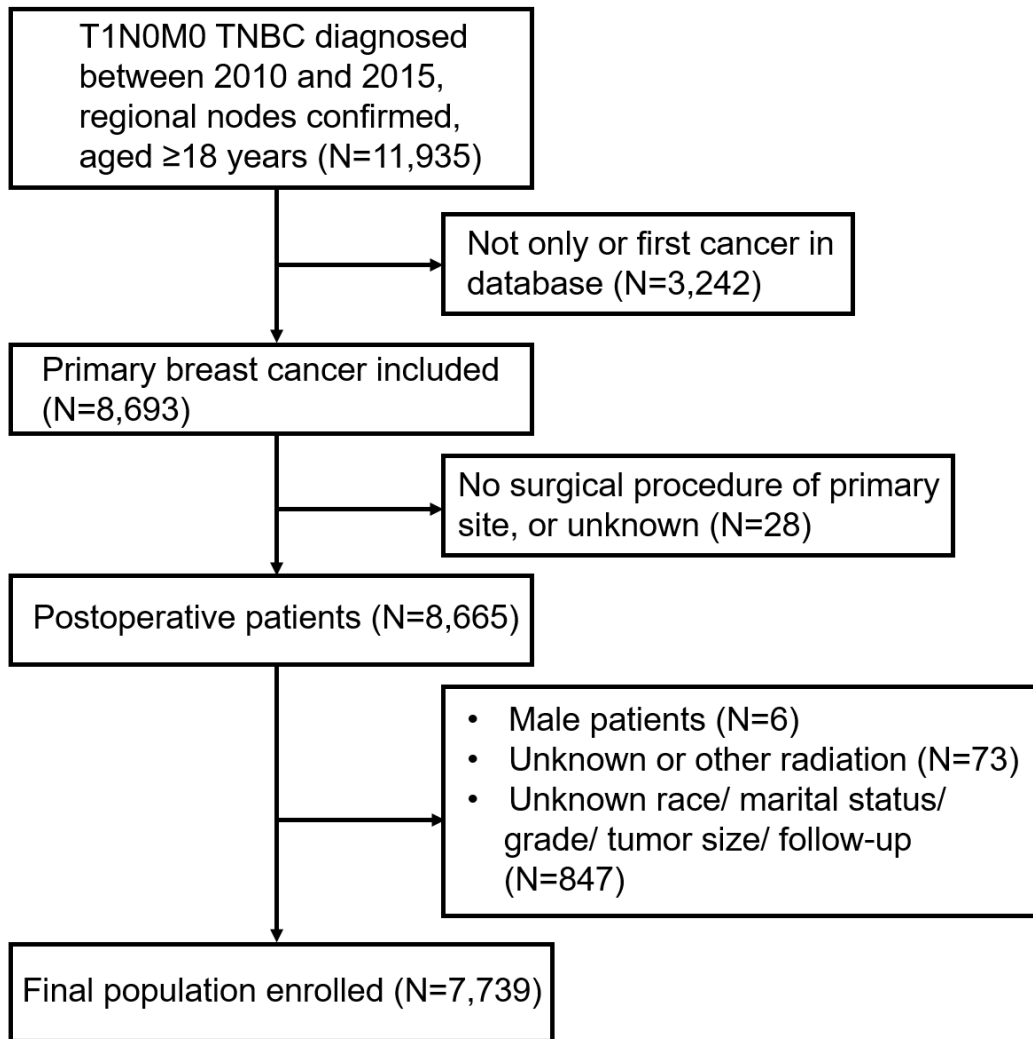

Supplement: jamanetwopen-e2021881-s001.pdf [file jamanetwopen-e2021881-s001.pdf]
